# Supplementary material for: Genetic diversity assessment of Tunisian Mycobacterium bovis population isolated from cattle
Source: PubMed Central journal article supplement (PMC5732386; doi:10.1186/s12917-017-1314-y), 2017-12-16
Supplement: 12917_2017_1314_MOESM1_ESM.pdf [file 12917_2017_1314_MOESM1_ESM.pdf]

**Additional file 1: Molecular typing data comparison of *M. bovis* isolates in different regions in Tunisia and in French**

| Study      | Source, (Nb)  | Nb isolates * | Region/ Nb                           | Total of genotypes | Common VNTR loci/different Genotypes |      |       |        |        |         | VNTR types | HGDI  | Total of cluster | Total of spoligotypes | Common frequent spoligotypes                         |                                                     |                                                      |                                                      |                                                      |                                                      |                                                     |                                                     |
|------------|---------------|---------------|--------------------------------------|--------------------|--------------------------------------|------|-------|--------|--------|---------|------------|-------|------------------|-----------------------|------------------------------------------------------|-----------------------------------------------------|------------------------------------------------------|------------------------------------------------------|------------------------------------------------------|------------------------------------------------------|-----------------------------------------------------|-----------------------------------------------------|
|            |               |               |                                      |                    | ETRA                                 | ETRB | MIRU4 | QUB11a | QUB11b | QUB3232 |            |       |                  |                       | SB 0120<br>Nb (%)<br>Region (Nb)<br>[Nb of genotype] | SB0134<br>Nb (%)<br>Region (Nb)<br>[Nb of genotype] | SB 0121<br>Nb (%)<br>Region (Nb)<br>[Nb of genotype] | SB 2025<br>Nb (%)<br>Region (Nb)<br>[Nb of genotype] | SB 0418<br>Nb (%)<br>Region (Nb)<br>[Nb of genotype] | SB 2024<br>Nb (%)<br>Region (Nb)<br>[Nb of genotype] | SB1003<br>Nb (%)<br>Region (Nb)<br>[Nb of genotype] | SB1200<br>Nb (%)<br>Region (Nb)<br>[Nb of genotype] |
| This study | Cattle, (149) | 96            | k, B, Je, Ma, Mo, A Sf, G, M, SB :10 | 73                 | 5                                    | 6    | 3     | 11     | 4      | 6       | MV1        | 0,993 | 15               | 25                    | 35<br>(36.4%)                                        | 11<br>(11.4%)                                       | 7<br>(7.2%)                                          | 7<br>(7.2%)                                          | 1<br>(1.04%)                                         | 1<br>(1.04%)                                         | 6<br>(6.25%)                                        | 4<br>(4.1%)                                         |
|            |               |               |                                      |                    | 5                                    | 5    | 3     | 10     | 4      | 6       | MV2        |       |                  |                       |                                                      |                                                     |                                                      |                                                      |                                                      |                                                      |                                                     |                                                     |
|            |               |               |                                      |                    | 4                                    | 5    | 3     | 11     | 3      | 9       | MV3        |       |                  |                       |                                                      |                                                     |                                                      |                                                      |                                                      |                                                      |                                                     |                                                     |
|            |               |               |                                      |                    | 4                                    | 7    | 3     | 11     | 3      | 6       | MV4        |       |                  |                       |                                                      |                                                     |                                                      |                                                      |                                                      |                                                      |                                                     |                                                     |
|            |               |               |                                      |                    | 5                                    | 5    | 3     | 11     | 3      | 7       | MV5        |       |                  |                       |                                                      |                                                     |                                                      |                                                      |                                                      |                                                      |                                                     |                                                     |
|            |               |               |                                      |                    | 5                                    | 5    | 3     | 11     | 4      | 4       | MV6        |       |                  |                       |                                                      |                                                     |                                                      |                                                      |                                                      |                                                      |                                                     |                                                     |
|            |               |               |                                      |                    | 4                                    | 2    | 3     | 11     | 3      | 6       | MV7        |       |                  |                       |                                                      |                                                     |                                                      |                                                      |                                                      |                                                      |                                                     |                                                     |
|            |               |               |                                      |                    | 5                                    | 5    | 3     | 11     | 2      | 7       | MV8        |       |                  |                       |                                                      |                                                     |                                                      |                                                      |                                                      |                                                      |                                                     |                                                     |
|            |               |               |                                      |                    | 4                                    | 2    | 3     | 11     | 3      | 6       | MV9        |       |                  |                       |                                                      |                                                     |                                                      |                                                      |                                                      |                                                      |                                                     |                                                     |
|            |               |               |                                      |                    | 3                                    | 5    | 3     | 11     | 3      | 6       | MV10       |       |                  |                       |                                                      |                                                     |                                                      |                                                      |                                                      |                                                      |                                                     |                                                     |
|            |               |               |                                      |                    | 5                                    | 3    | 3     | 11     | 2      | 6       | MV11       |       |                  |                       |                                                      |                                                     |                                                      |                                                      |                                                      |                                                      |                                                     |                                                     |
|            |               |               |                                      |                    | 2                                    | 3    | 2     | 11     | 2      | 7       | MV12       |       |                  |                       |                                                      |                                                     |                                                      |                                                      |                                                      |                                                      |                                                     |                                                     |
|            |               |               |                                      |                    | 5                                    | 5    | 3     | 11     | 2      | 7       | MV13       |       |                  |                       |                                                      |                                                     |                                                      |                                                      |                                                      |                                                      |                                                     |                                                     |
|            |               |               |                                      |                    | 5                                    | 7    | 3     | 10     | 4      | 6       | MV14       |       |                  |                       |                                                      |                                                     |                                                      |                                                      |                                                      |                                                      |                                                     |                                                     |
|            |               |               |                                      |                    | 4                                    | 5    | 3     | 11     | 5      | 5       | MV15       |       |                  |                       |                                                      |                                                     |                                                      |                                                      |                                                      |                                                      |                                                     |                                                     |
|            |               |               |                                      |                    | 5                                    | 5    | 3     | 11     | 4      | 6       | MV16       |       |                  |                       |                                                      |                                                     |                                                      |                                                      |                                                      |                                                      |                                                     |                                                     |
|            |               |               |                                      |                    | 5                                    | 5    | 3     | 11     | 5      | 6       | MV17       |       |                  |                       |                                                      |                                                     |                                                      |                                                      |                                                      |                                                      |                                                     |                                                     |
|            |               |               |                                      |                    | 7                                    | 6    | 3     | 11     | 3      | 9       | MV18       |       |                  |                       |                                                      |                                                     |                                                      |                                                      |                                                      |                                                      |                                                     |                                                     |
|            |               |               |                                      |                    | 4                                    | 5    | 3     | 11     | 4      | 6       | MV19       |       |                  |                       |                                                      |                                                     |                                                      |                                                      |                                                      |                                                      |                                                     |                                                     |
|            |               |               |                                      |                    | 5                                    | 4    | 3     | 11     | 4      | 8       | MV20       |       |                  |                       |                                                      |                                                     |                                                      |                                                      |                                                      |                                                      |                                                     |                                                     |
|            |               |               |                                      |                    | 5                                    | 5    | 3     | 11     | 2      | 6       | MV21       |       |                  |                       |                                                      |                                                     |                                                      |                                                      |                                                      |                                                      |                                                     |                                                     |
|            |               |               |                                      |                    | 5                                    | 5    | 3     | 11     | 1      | 6       | MV22       |       |                  |                       |                                                      |                                                     |                                                      |                                                      |                                                      |                                                      |                                                     |                                                     |
|            |               |               |                                      |                    | 4                                    | 3    | 3     | 11     | 3      | 6       | MV23       |       |                  |                       |                                                      |                                                     |                                                      |                                                      |                                                      |                                                      |                                                     |                                                     |
|            |               |               |                                      |                    | 4                                    | 5    | 3     | 11     | 3      | 6       | MV24       |       |                  |                       |                                                      |                                                     |                                                      |                                                      |                                                      |                                                      |                                                     |                                                     |
|            |               |               |                                      |                    | 4                                    | 5    | 3     | 11     | 3      | 6       | MV25       |       |                  |                       |                                                      |                                                     |                                                      |                                                      |                                                      |                                                      |                                                     |                                                     |
|            |               |               |                                      |                    | 4                                    | 5    | 3     | 11     | 3      | 6       | MV26       |       |                  |                       |                                                      |                                                     |                                                      |                                                      |                                                      |                                                      |                                                     |                                                     |
|            |               |               |                                      |                    | 3                                    | 5    | 3     | 9      | 3      | 6       | MV27       |       |                  |                       |                                                      |                                                     |                                                      |                                                      |                                                      |                                                      |                                                     |                                                     |
|            |               |               |                                      |                    | 5                                    | 5    | 3     | 11     | 3      | 5       | MV28       |       |                  |                       |                                                      |                                                     |                                                      |                                                      |                                                      |                                                      |                                                     |                                                     |
|            |               |               |                                      |                    | 4                                    | 3    | 2     | 11     | 2      | 7       | MV29       |       |                  |                       |                                                      |                                                     |                                                      |                                                      |                                                      |                                                      |                                                     |                                                     |
|            |               |               |                                      |                    | 5                                    | 5    | 2     | 11     | 4      | 6       | MV30       |       |                  |                       |                                                      |                                                     |                                                      |                                                      |                                                      |                                                      |                                                     |                                                     |
|            |               |               |                                      |                    | 5                                    | 4    | 3     | 11     | 4      | 6       | MV31       |       |                  |                       |                                                      |                                                     |                                                      |                                                      |                                                      |                                                      |                                                     |                                                     |
|            |               |               |                                      |                    | 5                                    | 5    | 3     | 10     | 4      | 6       | MV32       |       |                  |                       |                                                      |                                                     |                                                      |                                                      |                                                      |                                                      |                                                     |                                                     |
|            |               |               |                                      |                    | 4                                    | 5    | 4     | 11     | 4      | 6       | MV33       |       |                  |                       |                                                      |                                                     |                                                      |                                                      |                                                      |                                                      |                                                     |                                                     |
|            |               |               |                                      |                    | 5                                    | 3    | 3     | 11     | 3      | 6       | MV34       |       |                  |                       |                                                      |                                                     |                                                      |                                                      |                                                      |                                                      |                                                     |                                                     |
|            |               |               |                                      |                    | 3                                    | 5    | 3     | 11     | 2      | 6       | MV35       |       |                  |                       |                                                      |                                                     |                                                      |                                                      |                                                      |                                                      |                                                     |                                                     |
|            |               |               |                                      |                    | 5                                    | 4    | 3     | 11     | 4      | 6       | MV36       |       |                  |                       |                                                      |                                                     |                                                      |                                                      |                                                      |                                                      |                                                     |                                                     |
|            |               |               |                                      |                    | 5                                    | 4    | 3     | 11     | 4      | 3       | MV37       |       |                  |                       |                                                      |                                                     |                                                      |                                                      |                                                      |                                                      |                                                     |                                                     |
|            |               |               |                                      |                    | 5                                    | 3    | 3     | 11     | 1      | 6       | MV38       |       |                  |                       |                                                      |                                                     |                                                      |                                                      |                                                      |                                                      |                                                     |                                                     |
|            |               |               |                                      |                    | 5                                    | 4    | 3     | 11     | 4      | 3       | MV39       |       |                  |                       |                                                      |                                                     |                                                      |                                                      |                                                      |                                                      |                                                     |                                                     |
|            |               |               |                                      |                    | 6                                    | 4    | 3     | 8      | 3      | 4       | MV40       |       |                  |                       |                                                      |                                                     |                                                      |                                                      |                                                      |                                                      |                                                     |                                                     |



| Study                   | Source, (Nb)                                       | Nb of isolates * | Region/Nb                                                                                                                                  | Total of genotypes | Common VNTR loci/different Genotypes |       |       |        |        |         | HGDI | Total of cluster | Total of spoligotypes | Common frequent spoligotypes                         |                                                                  |                                                      |                                                      |                                                      |                                                      |                                                     |                                                     |                                     |
|-------------------------|----------------------------------------------------|------------------|--------------------------------------------------------------------------------------------------------------------------------------------|--------------------|--------------------------------------|-------|-------|--------|--------|---------|------|------------------|-----------------------|------------------------------------------------------|------------------------------------------------------------------|------------------------------------------------------|------------------------------------------------------|------------------------------------------------------|------------------------------------------------------|-----------------------------------------------------|-----------------------------------------------------|-------------------------------------|
|                         |                                                    |                  |                                                                                                                                            |                    | ETR-A                                | ETR-B | MIRU4 | QUB11a | QUB11b | QUB3232 |      |                  |                       | SB 0120<br>Nb (%)<br>Region (Nb)<br>[Nb of genotype] | SB0134<br>Nb (%)<br>Region (Nb)<br>[Nb of genotype]              | SB 0121<br>Nb (%)<br>Region (Nb)<br>[Nb of genotype] | SB 2025<br>Nb (%)<br>Region (Nb)<br>[Nb of genotype] | SB 0418<br>Nb (%)<br>Region (Nb)<br>[Nb of genotype] | SB 2024<br>Nb (%)<br>Region (Nb)<br>[Nb of genotype] | SB1003<br>Nb (%)<br>Region (Nb)<br>[Nb of genotype] | SB1200<br>Nb (%)<br>Region (Nb)<br>[Nb of genotype] |                                     |
| <i>L-K et al</i> [3]    | Cattle, (100)                                      | 35               | Sf, G, B, SB, N :5                                                                                                                         | 19                 | 4                                    | 3     | 3     | 11     | 3      | 5       |      | 0.969            | 6                     | 9                                                    | 16<br>(37.1%)<br><br>Sf(11)<br>B(2)<br>SB(2)<br>G(1)<br><br>[10] | 7<br>(20%)<br><br>Sf(7)<br><br>[2]                   | 1<br>(2.8%)<br><br>Sf(1)<br><br>[1]                  | 3<br>(8.57%)<br><br>Sf(3)<br><br>[1]                 | 2<br>(5.71%)<br><br>Sf(2)<br><br>[1]                 | 1<br>(2.8%)<br><br>N(1)<br><br>[1]                  | 2<br>(5.71%)<br><br>Sf(2)<br><br>[1]                | 1<br>(2.8%)<br><br>Sf(1)<br><br>[1] |
|                         |                                                    |                  |                                                                                                                                            |                    | 4                                    | 5     | 3     | 11     | 3      | 7       |      |                  |                       |                                                      |                                                                  |                                                      |                                                      |                                                      |                                                      |                                                     |                                                     |                                     |
|                         |                                                    |                  |                                                                                                                                            |                    | 4                                    | 2     | 3     | 9      | 3      | 5       |      |                  |                       |                                                      |                                                                  |                                                      |                                                      |                                                      |                                                      |                                                     |                                                     |                                     |
|                         |                                                    |                  |                                                                                                                                            |                    | 4                                    | 5     | 2     | 11     | 4      | 5       |      |                  |                       |                                                      |                                                                  |                                                      |                                                      |                                                      |                                                      |                                                     |                                                     |                                     |
|                         |                                                    |                  |                                                                                                                                            |                    | 4                                    | 5     | 2     | 11     | 5      | 5       |      |                  |                       |                                                      |                                                                  |                                                      |                                                      |                                                      |                                                      |                                                     |                                                     |                                     |
|                         |                                                    |                  |                                                                                                                                            |                    | 4                                    | 5     | 3     | 11     | 5      | 5       |      |                  |                       |                                                      |                                                                  |                                                      |                                                      |                                                      |                                                      |                                                     |                                                     |                                     |
|                         |                                                    |                  |                                                                                                                                            |                    | 5                                    | 5     | 3     | 11     | 2      | 6       | MV21 |                  |                       |                                                      |                                                                  |                                                      |                                                      |                                                      |                                                      |                                                     |                                                     |                                     |
|                         |                                                    |                  |                                                                                                                                            |                    | 3                                    | 5     | 3     | 11     | 3      | 6       | MV10 |                  |                       |                                                      |                                                                  |                                                      |                                                      |                                                      |                                                      |                                                     |                                                     |                                     |
|                         |                                                    |                  |                                                                                                                                            |                    | 6                                    | 5     | 3     | 10     | 2      | 6       | MV53 |                  |                       |                                                      |                                                                  |                                                      |                                                      |                                                      |                                                      |                                                     |                                                     |                                     |
|                         |                                                    |                  |                                                                                                                                            |                    | 5                                    | 5     | 3     | 11     | 4      | 4       | MV6  |                  |                       |                                                      |                                                                  |                                                      |                                                      |                                                      |                                                      |                                                     |                                                     |                                     |
|                         |                                                    |                  |                                                                                                                                            |                    | 5                                    | 4     | 3     | 11     | 4      | 6       | MV36 |                  |                       |                                                      |                                                                  |                                                      |                                                      |                                                      |                                                      |                                                     |                                                     |                                     |
|                         |                                                    |                  |                                                                                                                                            |                    | 5                                    | 2     | 3     | 6      | 4      | 5       |      |                  |                       |                                                      |                                                                  |                                                      |                                                      |                                                      |                                                      |                                                     |                                                     |                                     |
|                         |                                                    |                  |                                                                                                                                            |                    | 6                                    | 4     | 3     | 11     | 2      | 7       |      |                  |                       |                                                      |                                                                  |                                                      |                                                      |                                                      |                                                      |                                                     |                                                     |                                     |
| 5                       | 6                                                  | 3                | 11                                                                                                                                         | 2                  | 6                                    | MV63  |       |        |        |         |      |                  |                       |                                                      |                                                                  |                                                      |                                                      |                                                      |                                                      |                                                     |                                                     |                                     |
| 5                       | 1                                                  | 3                | 11                                                                                                                                         | 4                  | 11                                   |       |       |        |        |         |      |                  |                       |                                                      |                                                                  |                                                      |                                                      |                                                      |                                                      |                                                     |                                                     |                                     |
| 5                       | 3                                                  | 9                | 6                                                                                                                                          | 4                  | 8                                    |       |       |        |        |         |      |                  |                       |                                                      |                                                                  |                                                      |                                                      |                                                      |                                                      |                                                     |                                                     |                                     |
| 9                       | 2                                                  | 3                | 7                                                                                                                                          | 9                  | 1                                    |       |       |        |        |         |      |                  |                       |                                                      |                                                                  |                                                      |                                                      |                                                      |                                                      |                                                     |                                                     |                                     |
| <i>BK et al</i> [5]     | Milk, 306                                          | 6                | Mo, Tu, S : 3                                                                                                                              | 4                  | 5                                    | 4     | 4     | 12     | 4      | --      |      | --               | 1                     | 3                                                    | 0                                                                | 0                                                    | 0                                                    | 0                                                    | 0                                                    | 2<br>(33.3%)<br>[1]                                 | 1<br>(16.6%)<br>[1]                                 |                                     |
|                         |                                                    |                  |                                                                                                                                            |                    | 5                                    | 8     | 4     | 12     | 3      | --      |      |                  |                       |                                                      |                                                                  |                                                      |                                                      |                                                      |                                                      |                                                     |                                                     |                                     |
|                         |                                                    |                  |                                                                                                                                            |                    | 5                                    | 4     | 4     | 10     | 3      | --      |      |                  |                       |                                                      |                                                                  |                                                      |                                                      |                                                      |                                                      |                                                     |                                                     |                                     |
|                         |                                                    |                  |                                                                                                                                            |                    | 5                                    | 4     | 4     | 12     | 3      | --      |      |                  |                       |                                                      |                                                                  |                                                      |                                                      |                                                      |                                                      |                                                     |                                                     |                                     |
| <i>Hauer et al</i> [11] | Cattle (88%), wild animals (9%), farm animals (3%) | 4,020            | Ardennes ; Ariège ; Côte d'Or ; Corsica Island ; Dordogne & Charente ; Dordogne ; Normandy ; Atlantic ; Pyrenees ; Landes ; Lot et Garonne | 706                | 5                                    | 3     | 6     | 11     | 4      | 8       |      | ---              | --                    | 176                                                  | 778<br>(26%)<br>[154]                                            | 270<br>(11%)<br>[53]                                 | 154<br>(6%)<br>[50]                                  | --                                                   | --                                                   | --                                                  | --                                                  | --                                  |
|                         |                                                    |                  |                                                                                                                                            |                    | 5                                    | 5     | 3     | 11     | 4      | 6       | MV16 |                  |                       |                                                      |                                                                  |                                                      |                                                      |                                                      |                                                      |                                                     |                                                     |                                     |
|                         |                                                    |                  |                                                                                                                                            |                    | 4                                    | 5     | 3     | 11     | 4      | 7       |      |                  |                       |                                                      |                                                                  |                                                      |                                                      |                                                      |                                                      |                                                     |                                                     |                                     |
|                         |                                                    |                  |                                                                                                                                            |                    | 5                                    | 5     | 3     | 11     | 4      | 4       | MV6  |                  |                       |                                                      |                                                                  |                                                      |                                                      |                                                      |                                                      |                                                     |                                                     |                                     |
|                         |                                                    |                  |                                                                                                                                            |                    | 5                                    | 3     | 3     | 9      | 4      | 6       |      |                  |                       |                                                      |                                                                  |                                                      |                                                      |                                                      |                                                      |                                                     |                                                     |                                     |
|                         |                                                    |                  |                                                                                                                                            |                    | 6                                    | 5     | 3     | 6      | 4      | 6       |      |                  |                       |                                                      |                                                                  |                                                      |                                                      |                                                      |                                                      |                                                     |                                                     |                                     |
|                         |                                                    |                  |                                                                                                                                            |                    | 7                                    | 4     | 3     | 10     | 4      | 10      |      |                  |                       |                                                      |                                                                  |                                                      |                                                      |                                                      |                                                      |                                                     |                                                     |                                     |
|                         |                                                    |                  |                                                                                                                                            |                    | 5                                    | 4     | 3     | 11     | 4      | 6       | MV36 |                  |                       |                                                      |                                                                  |                                                      |                                                      |                                                      |                                                      |                                                     |                                                     |                                     |
|                         |                                                    |                  |                                                                                                                                            |                    | 6                                    | 4     | 3     | 6      | 4      | 6       |      |                  |                       |                                                      |                                                                  |                                                      |                                                      |                                                      |                                                      |                                                     |                                                     |                                     |
|                         |                                                    |                  |                                                                                                                                            |                    | 6                                    | 4     | 3     | 11     | 2      | 7       |      |                  |                       |                                                      |                                                                  |                                                      |                                                      |                                                      |                                                      |                                                     |                                                     |                                     |
| 5                       | 2                                                  | 3                | 8                                                                                                                                          | 2                  | 6                                    |       |       |        |        |         |      |                  |                       |                                                      |                                                                  |                                                      |                                                      |                                                      |                                                      |                                                     |                                                     |                                     |

N° : Number ; \* : Only *M.bovis*; Sf : Sfax ; G : gabes ; M : Mahdia, SB : Sidi bouzid, K : kairaouen, B : Beja, Je : Jendouba, Ma : Manouba, Mo : Monastir, T : Tunis, N : Nabeul, A : Ariana. <sup>‡</sup>Common region between the three Tunisian studies are in fold. MV: MIRU-VNTR.
